# Supplementary material for: A Nodulation-Proficient Nonrhizobial Inhabitant of Pueraria phaseoloides
Source: Hindawi journal article supplement (doi:10.1155/2019/9782684), 2019-04-01
Supplement: f1 [file 9782684.f1.pdf]

713  
714  
715  
716  
717  
718

**Supplementary Figures and Tables**  
**Cellulose utilization by Sub1.**

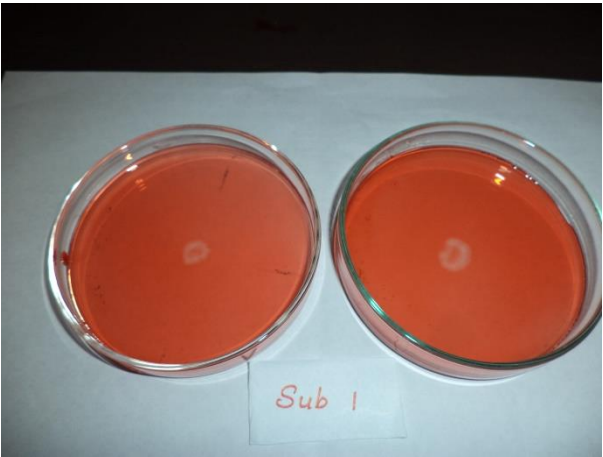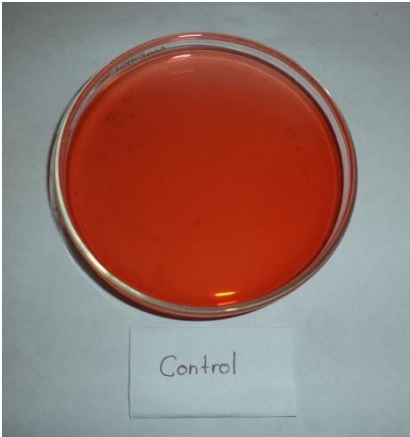

719  
720

**Protein utilization by Sub 1.**

722

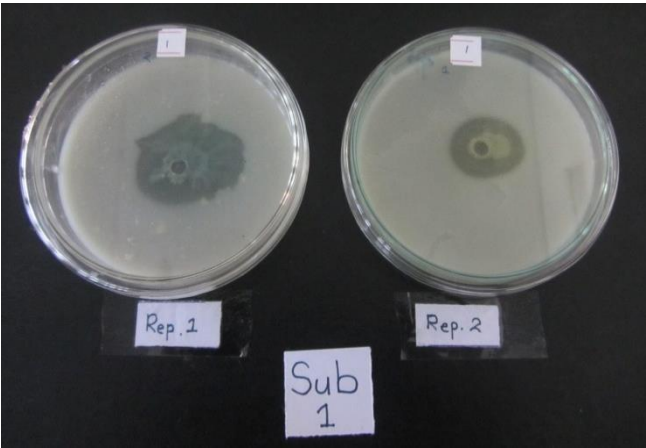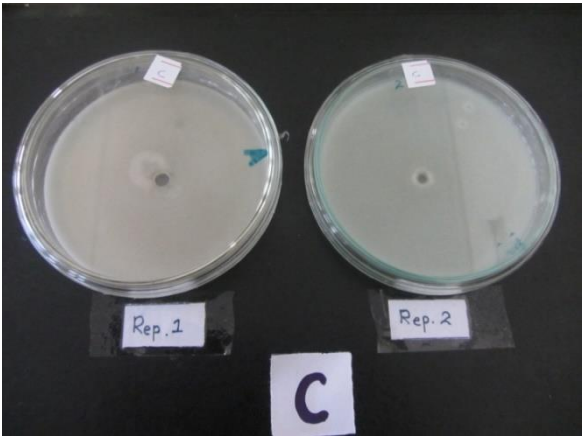

723  
724  
725  
726  
727  
728

729

730 **Pectin utilization by Sub1 (Test plates with no pectinase activity)**

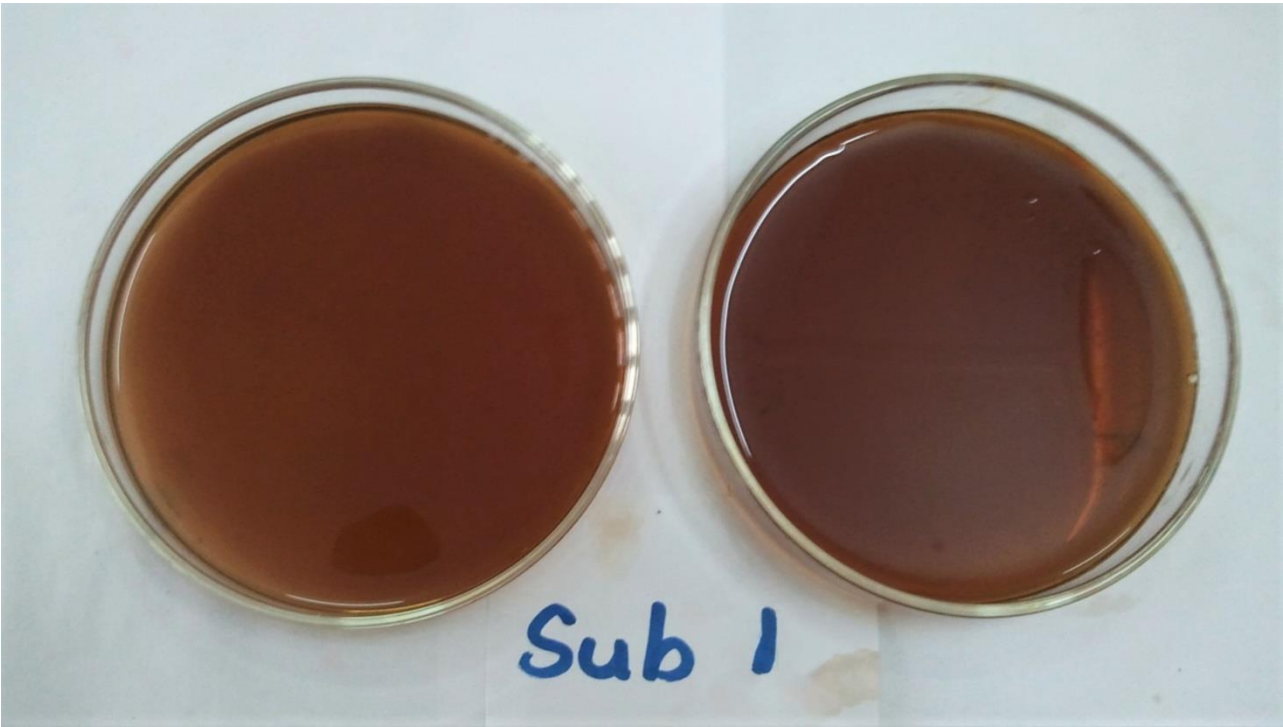

731

732 **Supplementary Figure 1 – Cellulose, Pectin and Protein utilization by Sub1.**

733

734

735

736

737

738

739

740

741

742

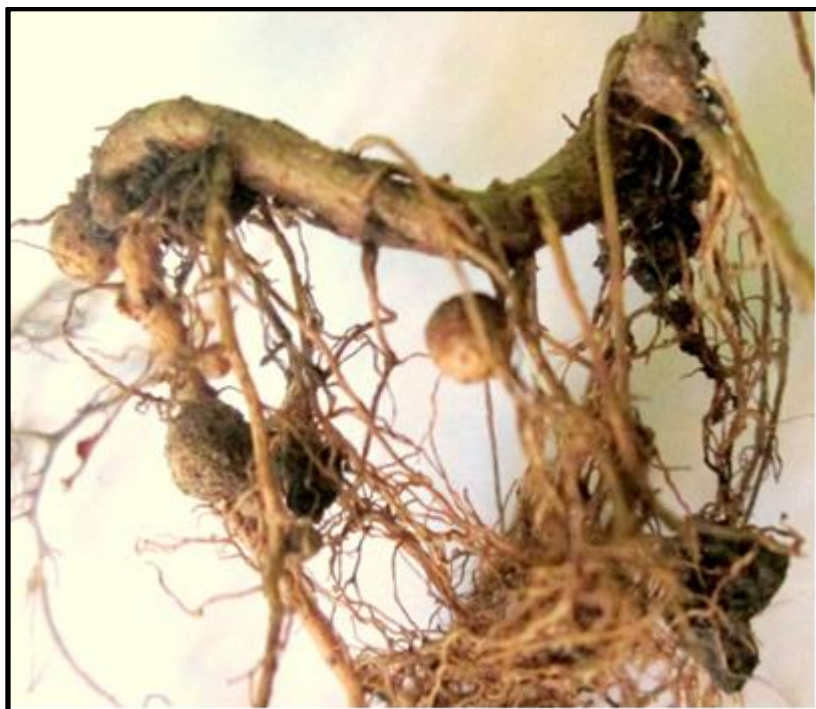

743

744 **Supplementary Figure 2(a) - Original nodules that were used for the isolation**  
745 **process, as observed in *Pueraria* plants.**

746

747

748

749

750

751

752

753

754

755

756

757

758

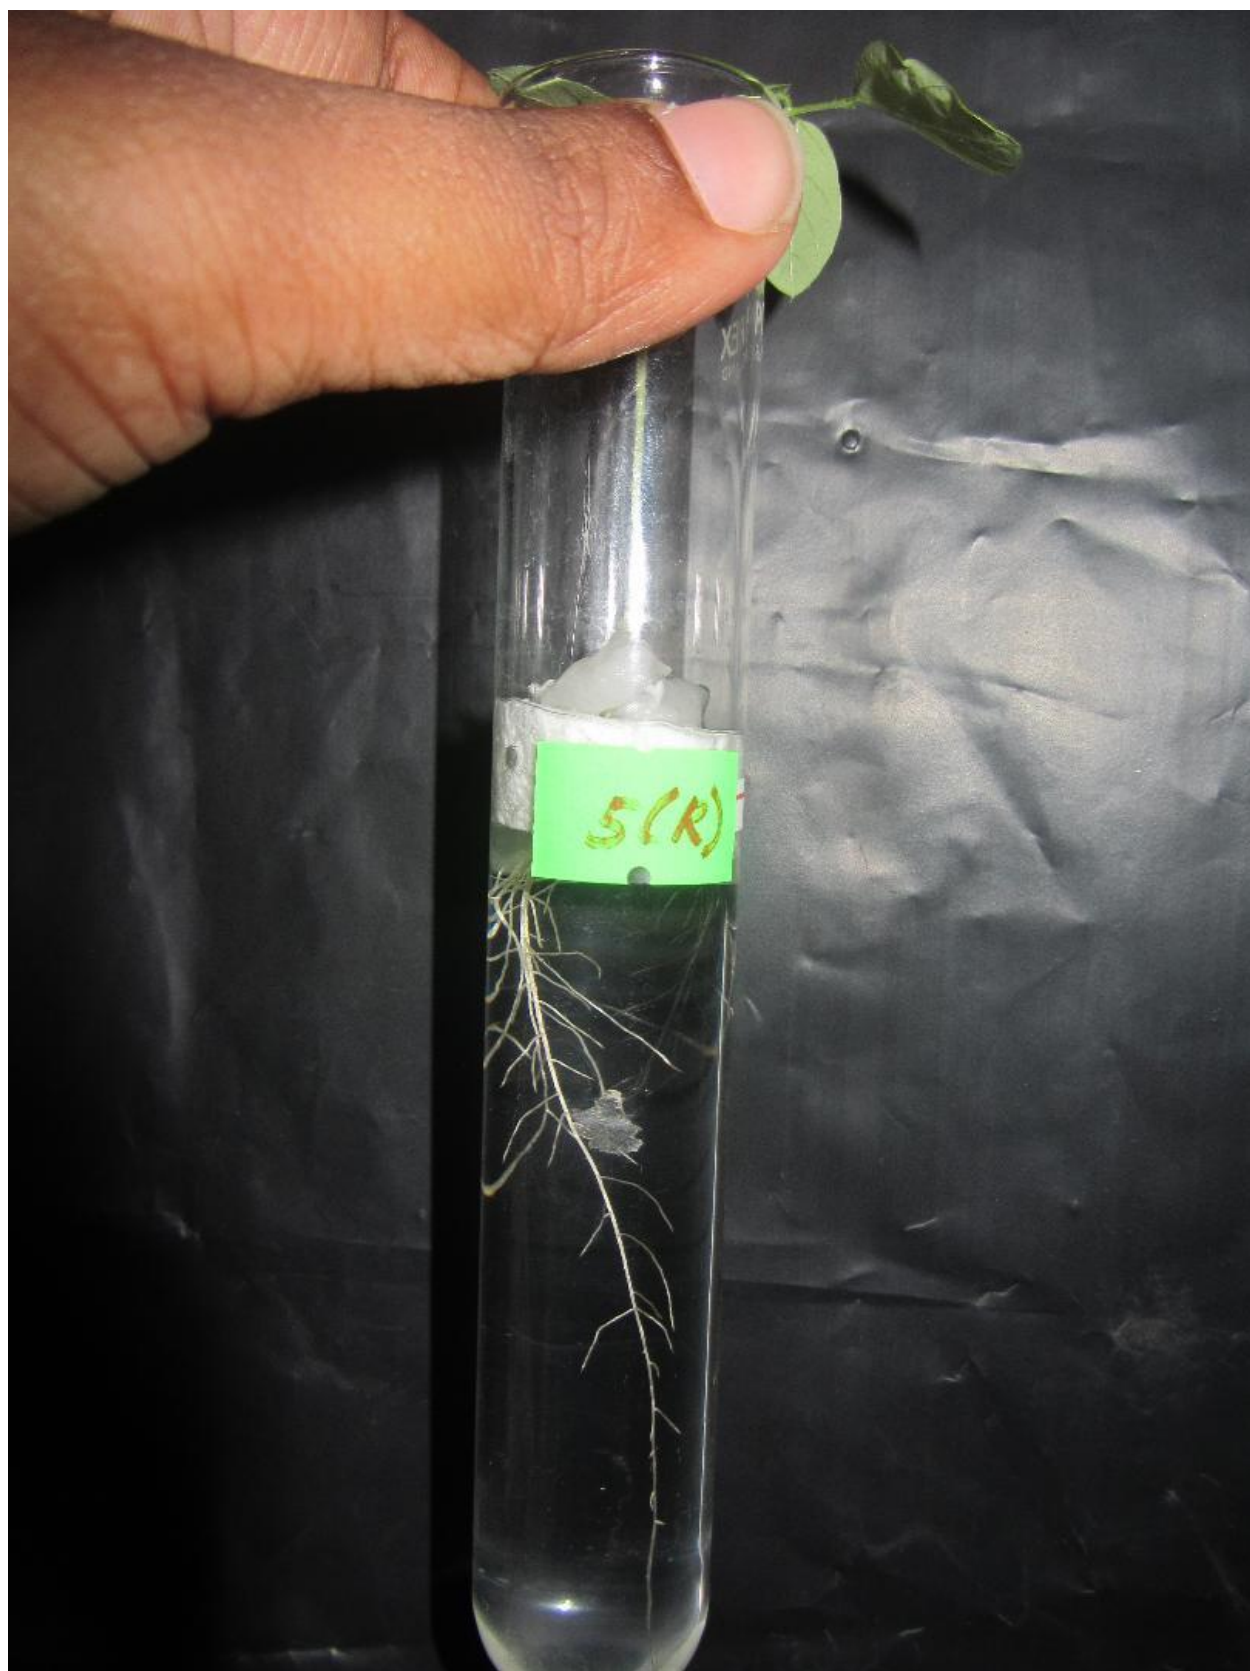



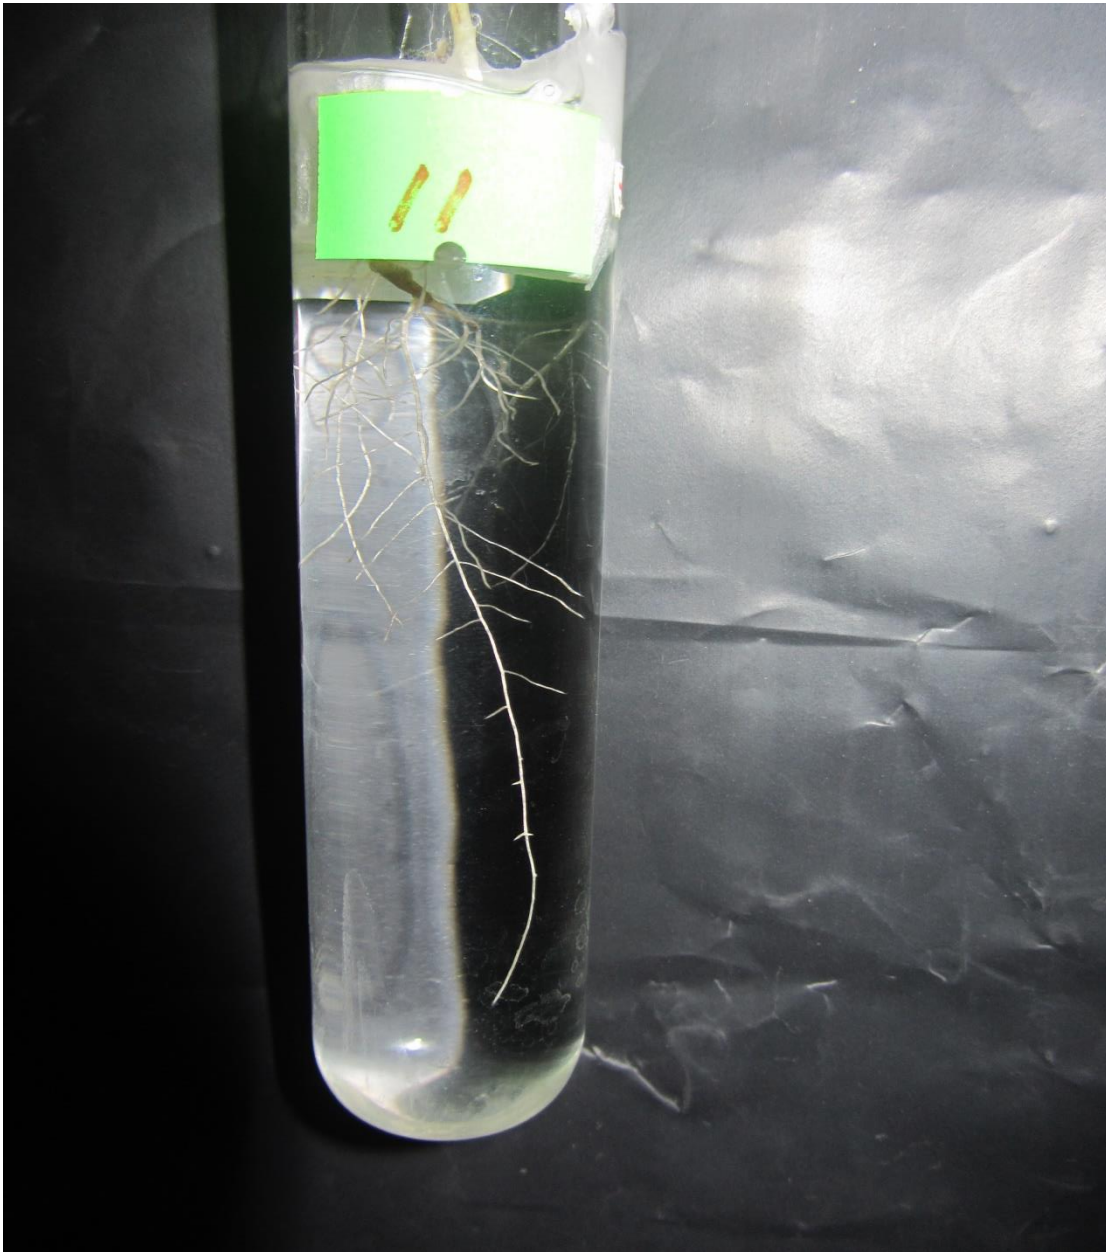

**Supplementary Figure 2(b)- Two negative controls of Sub1 with no visible nodules (above)**

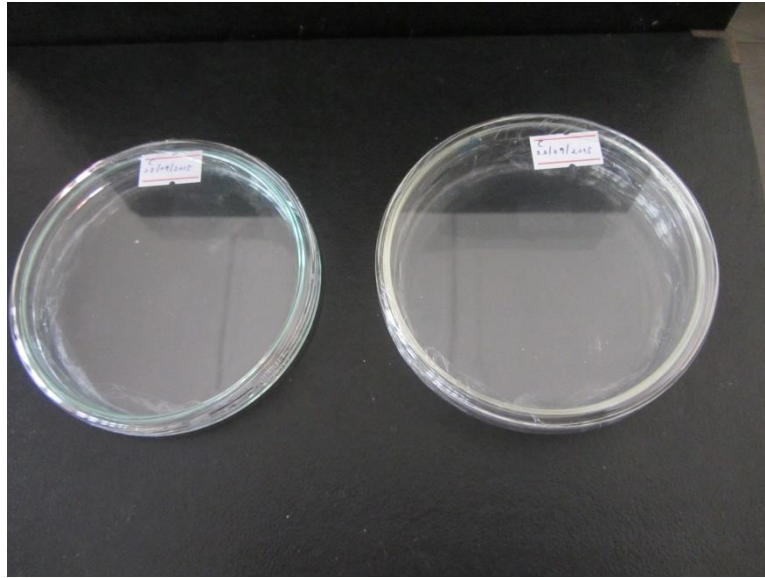

**Supplementary figure 3 - Negative controls for proline plates to assess swarming motility by Sub1.**

831

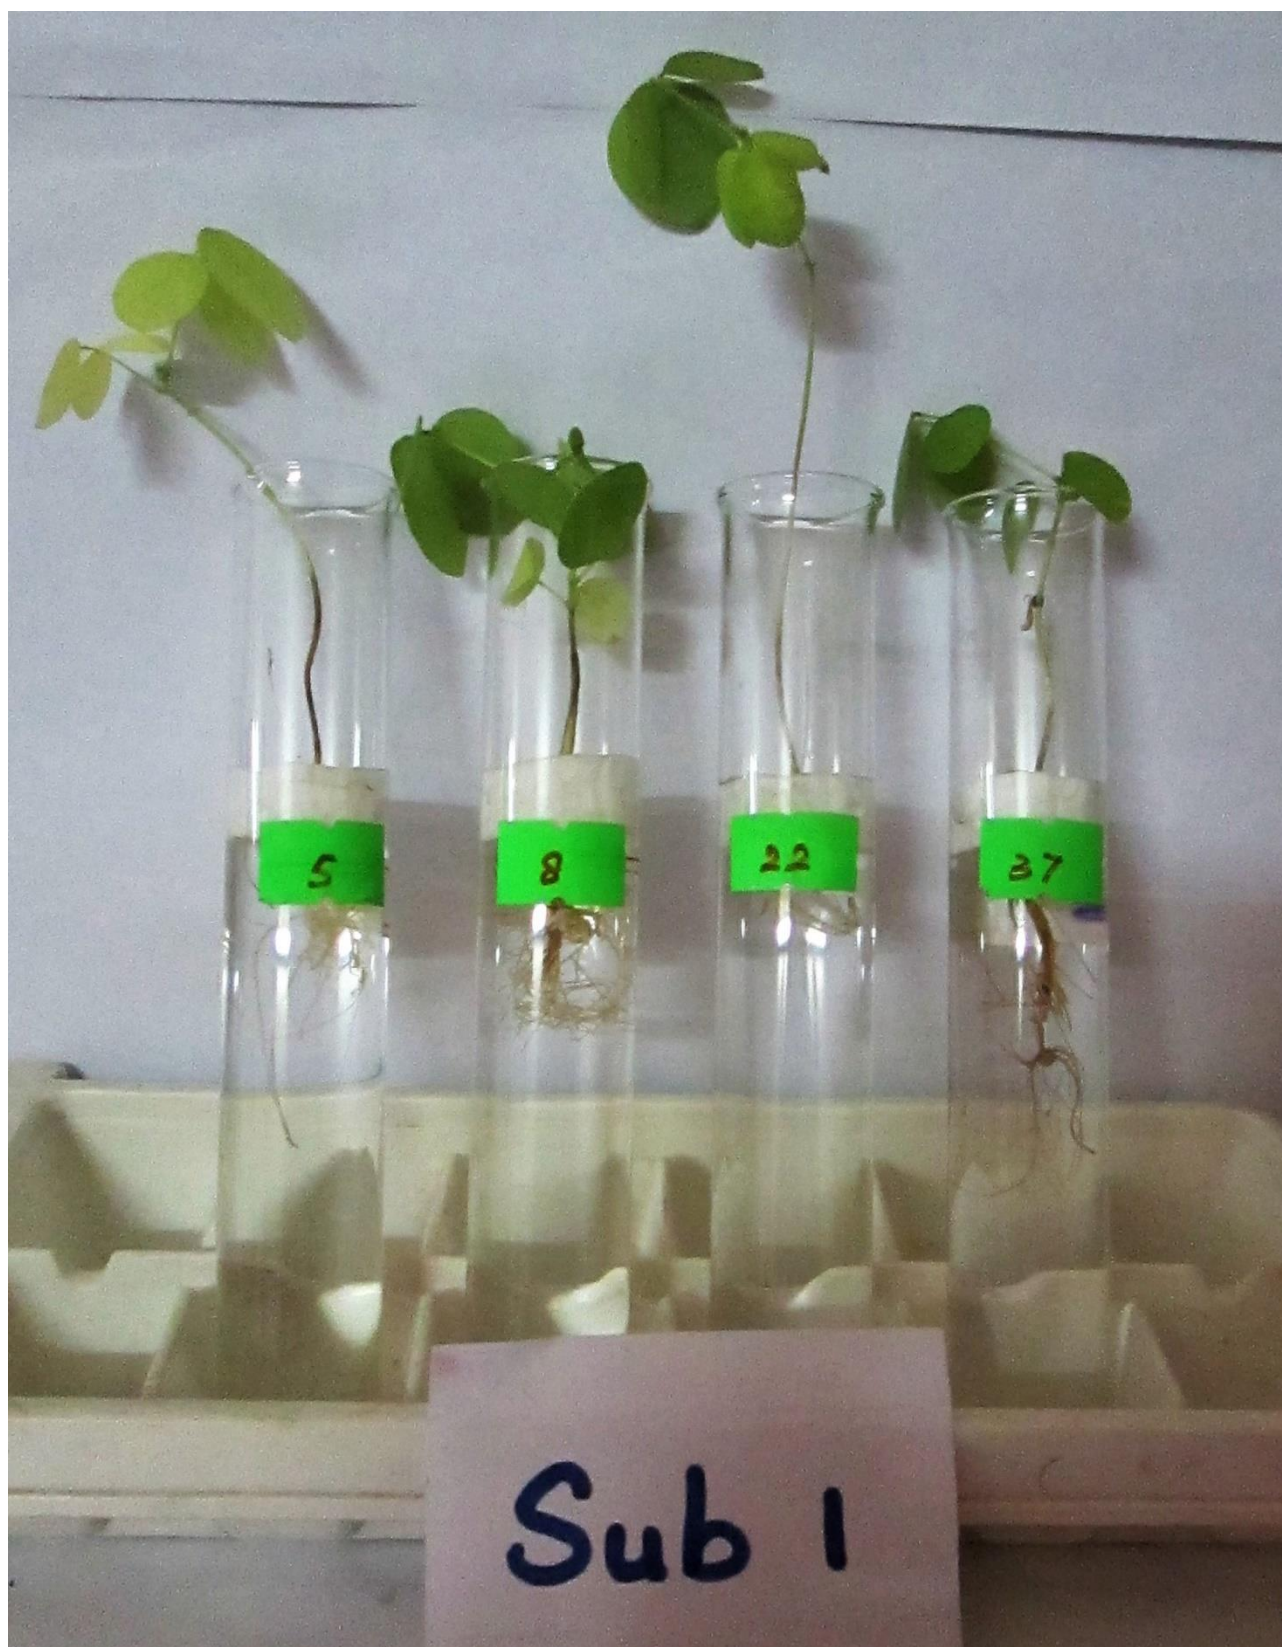

832  
833  
834  
835  
836  
837  
838  
839



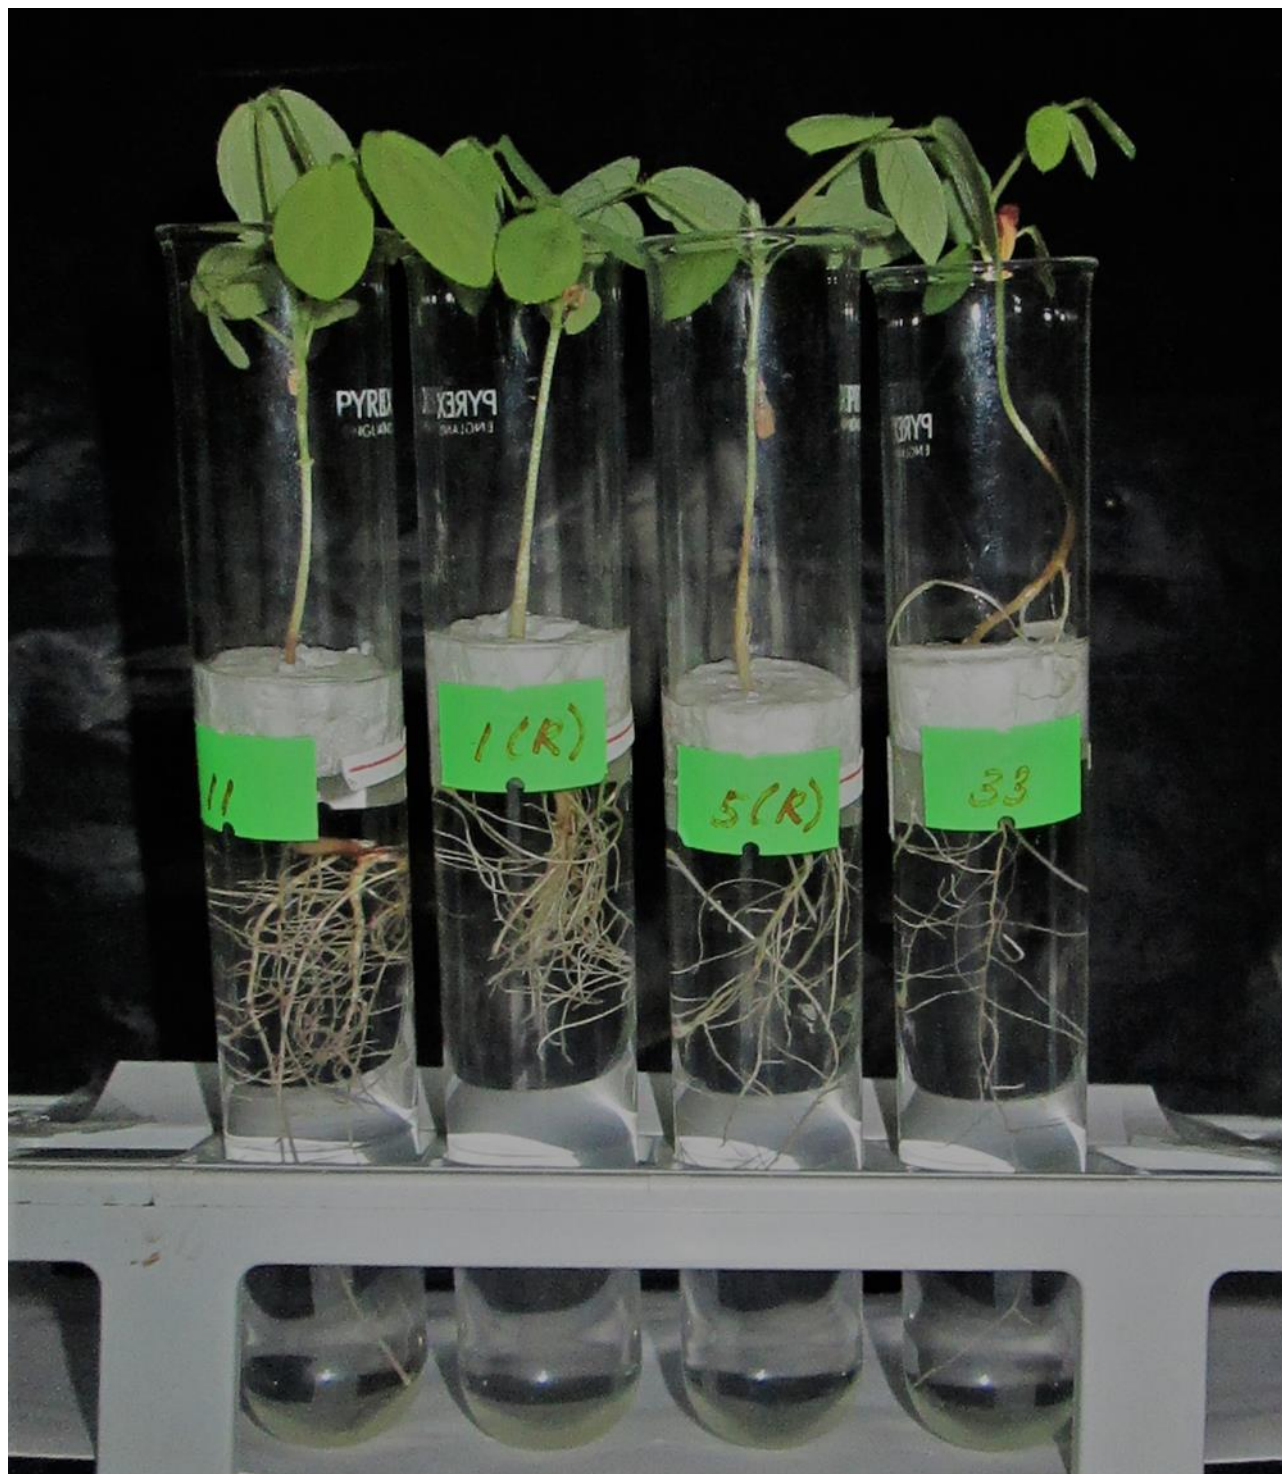

**Supplementary Figure 4 – Sub1 infected plants (top) and control plants (bottom), showing differences in shoot length at week 5, post-reinfection.**



Control

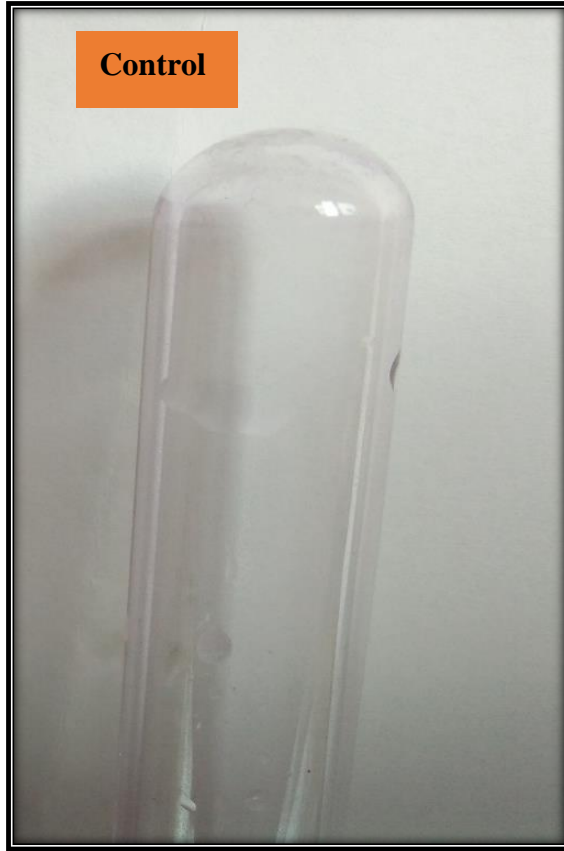

**Supplementary Figure 5 – The negative control showing no biofilm formation. Biofilm formation by Sub1 is shown in figure 3.**

894 **Supplementary Table 1 – Statistical analysis on root lengths of the**  
895 **plants**  
896

897 **One-way ANOVA: Beginning\_1 versus Experiment\_1**

898  
899 Method  
900  
901 Null hypothesis All means are equal  
902 Alternative hypothesis At least one mean is different  
903 Significance level  $\alpha = 0.05$   
904  
905 Equal variances were assumed for the analysis.  
906

907  
908 Factor Information  
909  
910 Factor Levels Values  
911 Experiment\_1 2 Control, Sub 1  
912

913  
914 Analysis of Variance  
915  
916 Source DF Adj SS Adj MS F-Value P-Value  
917 Experiment\_1 1 0.6050 0.6050 2.30 0.180  
918 Error 6 1.5750 0.2625  
919 Total 7 2.1800  
920

921  
922 Model Summary  
923  
924 S R-sq R-sq(adj) R-sq(pred)  
925 0.512348 27.75% 15.71% 0.00%  
926

927  
928 Means  
929  
930 Experiment\_1 N Mean StDev 95% CI  
931 Control 4 1.175 0.450 (0.548, 1.802)  
932 Sub 1 4 1.725 0.568 (1.098, 2.352)  
933

934 Pooled StDev = 0.512348  
935  
936

937  
938  
939 **One-way ANOVA: 1st week\_1 versus Experiment\_1**

940  
941 Method  
942  
943 Null hypothesis All means are equal  
944 Alternative hypothesis At least one mean is different  
945 Significance level  $\alpha = 0.05$   
946  
947 Equal variances were assumed for the analysis.  
948

949  
950 Factor Information  
951  
952 Factor Levels Values  
953 Experiment\_1 2 Control, Sub 1  
954

955  
956 Analysis of Variance  
957  
958 Source DF Adj SS Adj MS F-Value P-Value

|              |   |        |        |      |       |
|--------------|---|--------|--------|------|-------|
| Experiment_1 | 1 | 0.1513 | 0.1513 | 0.16 | 0.707 |
| Error        | 6 | 5.8175 | 0.9696 |      |       |
| Total        | 7 | 5.9687 |        |      |       |

Model Summary

| S        | R-sq  | R-sq(adj) | R-sq(pred) |
|----------|-------|-----------|------------|
| 0.984674 | 2.53% | 0.00%     | 0.00%      |

Means

| Experiment_1 | N | Mean  | StDev | 95% CI         |
|--------------|---|-------|-------|----------------|
| Control      | 4 | 2.275 | 1.328 | (1.070, 3.480) |
| Sub 1        | 4 | 2.550 | 0.420 | (1.345, 3.755) |

Pooled StDev = 0.984674

One-way ANOVA: 2nd week\_1 versus Experiment\_1

Method

|                        |                                |
|------------------------|--------------------------------|
| Null hypothesis        | All means are equal            |
| Alternative hypothesis | At least one mean is different |
| Significance level     | $\alpha$ = 0.05                |

Equal variances were assumed for the analysis.

Factor Information

| Factor       | Levels | Values         |
|--------------|--------|----------------|
| Experiment_1 | 2      | Control, Sub 1 |

Analysis of Variance

| Source       | DF | Adj SS  | Adj MS  | F-Value | P-Value |
|--------------|----|---------|---------|---------|---------|
| Experiment_1 | 1  | 0.02000 | 0.02000 | 0.01    | 0.912   |
| Error        | 6  | 9.12000 | 1.52000 |         |         |
| Total        | 7  | 9.14000 |         |         |         |

Model Summary

| S       | R-sq  | R-sq(adj) | R-sq(pred) |
|---------|-------|-----------|------------|
| 1.23288 | 0.22% | 0.00%     | 0.00%      |

Means

| Experiment_1 | N | Mean  | StDev | 95% CI         |
|--------------|---|-------|-------|----------------|
| Control      | 4 | 3.500 | 1.294 | (1.992, 5.008) |
| Sub 1        | 4 | 3.600 | 1.169 | (2.092, 5.108) |

Pooled StDev = 1.23288

One-way ANOVA: 3rd week\_1 versus Experiment\_1

Method



1026  
1027 Null hypothesis All means are equal  
1028 Alternative hypothesis At least one mean is different  
1029 Significance level  $\alpha = 0.05$   
1030  
1031 Equal variances were assumed for the analysis.  
1032  
1033

1034 Factor Information  
1035

1036 Factor Levels Values  
1037 Experiment\_1 2 Control, Sub 1  
1038  
1039

1040 Analysis of Variance  
1041

| Source       | DF | Adj SS  | Adj MS | F-Value | P-Value |
|--------------|----|---------|--------|---------|---------|
| Experiment_1 | 1  | 0.1250  | 0.1250 | 0.05    | 0.830   |
| Error        | 6  | 14.9150 | 2.4858 |         |         |
| Total        | 7  | 15.0400 |        |         |         |

1046  
1047

1048 Model Summary  
1049

| S       | R-sq  | R-sq(adj) | R-sq(pred) |
|---------|-------|-----------|------------|
| 1.57665 | 0.83% | 0.00%     | 0.00%      |

1052  
1053

1054 Means  
1055

| Experiment_1 | N | Mean  | StDev | 95% CI         |
|--------------|---|-------|-------|----------------|
| Control      | 4 | 5.225 | 1.115 | (3.296, 7.154) |
| Sub 1        | 4 | 4.975 | 1.931 | (3.046, 6.904) |

1059

1060 Pooled StDev = 1.57665  
1061  
1062

1063  
1064  
1065 **One-way ANOVA: 4th week\_1 versus Experiment\_1**

1066  
1067 Method  
1068

1069 Null hypothesis All means are equal  
1070 Alternative hypothesis At least one mean is different  
1071 Significance level  $\alpha = 0.05$   
1072  
1073 Equal variances were assumed for the analysis.  
1074  
1075

1076 Factor Information  
1077

1078 Factor Levels Values  
1079 Experiment\_1 2 Control, Sub 1  
1080  
1081

1082 Analysis of Variance  
1083

| Source       | DF | Adj SS | Adj MS | F-Value | P-Value |
|--------------|----|--------|--------|---------|---------|
| Experiment_1 | 1  | 5.281  | 5.281  | 0.55    | 0.487   |
| Error        | 6  | 57.808 | 9.635  |         |         |
| Total        | 7  | 63.089 |        |         |         |

1088  
1089

1090 Model Summary  
1091

| S       | R-sq  | R-sq(adj) | R-sq(pred) |
|---------|-------|-----------|------------|
| 3.10396 | 8.37% | 0.00%     | 0.00%      |

1093

1094  
1095  
1096  
1097  
1098  
1099  
1100  
1101  
1102  
1103  
1104  
1105  
1106  
1107  
1108  
1109  
1110  
1111  
1112  
1113  
1114  
1115  
1116  
1117  
1118  
1119  
1120  
1121  
1122  
1123  
1124  
1125  
1126  
1127  
1128  
1129  
1130  
1131  
1132  
1133  
1134  
1135  
1136  
1137  
1138  
1139  
1140  
1141  
1142  
1143  
1144  
1145  
1146  
1147  
1148  
1149  
1150  
1151  
1152  
1153  
1154  
1155  
1156  
1157  
1158  
1159  
1160

Means

| Experiment_1 | N | Mean | StDev | 95% CI        |
|--------------|---|------|-------|---------------|
| Control      | 4 | 8.82 | 3.45  | (5.03, 12.62) |
| Sub 1        | 4 | 7.20 | 2.71  | (3.40, 11.00) |

Pooled StDev = 3.10396

**One-way ANOVA: 5th week\_1 versus Experiment\_1**

Method

Null hypothesis All means are equal  
Alternative hypothesis At least one mean is different  
Significance level  $\alpha = 0.05$

Equal variances were assumed for the analysis.

Factor Information

| Factor       | Levels | Values         |
|--------------|--------|----------------|
| Experiment_1 | 2      | Control, Sub 1 |

Analysis of Variance

| Source       | DF | Adj SS | Adj MS | F-Value | P-Value |
|--------------|----|--------|--------|---------|---------|
| Experiment_1 | 1  | 25.56  | 25.561 | 3.00    | 0.134   |
| Error        | 6  | 51.19  | 8.531  |         |         |
| Total        | 7  | 76.75  |        |         |         |

Model Summary

| S       | R-sq   | R-sq(adj) | R-sq(pred) |
|---------|--------|-----------|------------|
| 2.92083 | 33.31% | 22.19%    | 0.00%      |

Means

| Experiment_1 | N | Mean  | StDev | 95% CI        |
|--------------|---|-------|-------|---------------|
| Control      | 4 | 11.48 | 3.31  | (7.90, 15.05) |
| Sub 1        | 4 | 7.90  | 2.46  | (4.33, 11.47) |

Pooled StDev = 2.92083

**One-way ANOVA: 6th week\_1 versus Experiment\_1**

Method

Null hypothesis All means are equal  
Alternative hypothesis At least one mean is different  
Significance level  $\alpha = 0.05$

Equal variances were assumed for the analysis.

Factor Information

```
1161 Factor          Levels  Values
1162 Experiment_1      2    Control, Sub 1
1163
1164
1165 Analysis of Variance
1166
1167 Source          DF   Adj SS   Adj MS   F-Value   P-Value
1168 Experiment_1     1    53.05   53.045    9.78     0.020
1169 Error            6    32.53    5.422
1170 Total            7    85.58
1171
1172
1173 Model Summary
1174
1175 S      R-sq   R-sq(adj)  R-sq(pred)
1176 2.32845  61.99%    55.65%     32.42%
1177
1178
1179 Means
1180
1181 Experiment_1  N    Mean   StDev     95% CI
1182 Control      4   13.40    2.48  (10.55, 16.25)
1183 Sub 1        4    8.25    2.17  ( 5.40, 11.10)
1184
1185 Pooled StDev = 2.32845
1186
```

1187

## 1188 One-way ANOVA: 7th week\_1 versus Experiment\_1

1189

1190

1191

1192

1193

1194

1195

1196

1197

1198

1199

1200

1201

1202

1203

1204

1205

1206

1207

1208

1209

1210

1211

1212

1213

1214

1215

1216

1217

1218

1219

1220

1221

1222

1223

1224

1225

1226

1227

```
Method

Null hypothesis          All means are equal
Alternative hypothesis    At least one mean is different
Significance level        $\alpha = 0.05$ 

Equal variances were assumed for the analysis.
```

### Factor Information

```
Factor          Levels  Values
Experiment_1      2    Control, Sub 1
```

### Analysis of Variance

```
Source          DF   Adj SS   Adj MS   F-Value   P-Value
Experiment_1     1    80.01   80.011    20.81     0.004
Error            6    23.07    3.845
Total            7   103.08
```

### Model Summary

```
S      R-sq   R-sq(adj)  R-sq(pred)
1.96076  77.62%    73.89%     60.22%
```

### Means

```
Experiment_1  N    Mean   StDev     95% CI
Control      4   15.000    1.667  (12.601, 17.399)
Sub 1        4    8.68    2.22  ( 6.28, 11.07)
```

Pooled StDev = 1.96076



## Supplementary Table 2 - Statistical analysis of shoot lengths in plants

### One-way ANOVA: 1st week versus Treatment

Method

Null hypothesis All means are equal  
Alternative hypothesis At least one mean is different  
Significance level  $\alpha = 0.05$

Equal variances were assumed for the analysis.

Factor Information

| Factor    | Levels | Values              |
|-----------|--------|---------------------|
| Treatment | 7      | 1, 2, 3, 4, 5, 6, 7 |

Analysis of Variance

| Source    | DF | Adj SS | Adj MS | F-Value | P-Value |
|-----------|----|--------|--------|---------|---------|
| Treatment | 6  | 15.95  | 2.658  | 1.02    | 0.439   |
| Error     | 21 | 54.67  | 2.603  |         |         |
| Total     | 27 | 70.62  |        |         |         |

Model Summary

| S       | R-sq   | R-sq(adj) | R-sq(pred) |
|---------|--------|-----------|------------|
| 1.61352 | 22.58% | 0.46%     | 0.00%      |

Means

| Treatment | N | Mean  | StDev | 95% CI         |
|-----------|---|-------|-------|----------------|
| 1         | 4 | 8.000 | 1.992 | (6.322, 9.678) |
| 2         | 4 | 7.050 | 1.863 | (5.372, 8.728) |
| 3         | 4 | 5.850 | 0.661 | (4.172, 7.528) |
| 4         | 4 | 7.225 | 1.130 | (5.547, 8.903) |
| 5         | 4 | 7.38  | 2.50  | ( 5.70, 9.05)  |
| 6         | 4 | 6.825 | 0.714 | (5.147, 8.503) |
| 7         | 4 | 5.750 | 1.520 | (4.072, 7.428) |

Pooled StDev = 1.61352

### One-way ANOVA: 2nd week versus Treatment

Method

Null hypothesis All means are equal  
Alternative hypothesis At least one mean is different  
Significance level  $\alpha = 0.05$

Equal variances were assumed for the analysis.

Factor Information

| Factor    | Levels | Values              |
|-----------|--------|---------------------|
| Treatment | 7      | 1, 2, 3, 4, 5, 6, 7 |

|      |                      |    |        |        |         |         |
|------|----------------------|----|--------|--------|---------|---------|
| 1293 | Analysis of Variance |    |        |        |         |         |
| 1294 |                      |    |        |        |         |         |
| 1295 | Source               | DF | Adj SS | Adj MS | F-Value | P-Value |
| 1296 | Treatment            | 6  | 13.50  | 2.250  | 0.91    | 0.505   |
| 1297 | Error                | 21 | 51.77  | 2.465  |         |         |
| 1298 | Total                | 27 | 65.27  |        |         |         |

|      |               |         |        |           |            |
|------|---------------|---------|--------|-----------|------------|
| 1299 | Model Summary |         |        |           |            |
| 1300 |               |         |        |           |            |
| 1301 |               | S       | R-sq   | R-sq(adj) | R-sq(pred) |
| 1302 |               | 1.57003 | 20.69% | 0.00%     | 0.00%      |

|      |                        |   |       |       |                |
|------|------------------------|---|-------|-------|----------------|
| 1305 | Means                  |   |       |       |                |
| 1306 |                        |   |       |       |                |
| 1307 | Treatment              | N | Mean  | StDev | 95% CI         |
| 1308 | 1                      | 4 | 8.35  | 2.06  | ( 6.72, 9.98)  |
| 1309 | 2                      | 4 | 7.07  | 2.17  | ( 5.44, 8.71)  |
| 1310 | 3                      | 4 | 7.000 | 0.770 | (5.367, 8.633) |
| 1311 | 4                      | 4 | 7.850 | 1.079 | (6.217, 9.483) |
| 1312 | 5                      | 4 | 8.250 | 1.984 | (6.617, 9.883) |
| 1313 | 6                      | 4 | 7.125 | 0.618 | (5.492, 8.758) |
| 1314 | 7                      | 4 | 6.300 | 1.494 | (4.667, 7.933) |
| 1315 | Pooled StDev = 1.57003 |   |       |       |                |

1317

1318

1319

1320

1321

1322

1323

1324

1325

1326

1327

1328

1329

1330

1331

1332

1333

1334

1335

1336

1337

1338

1339

1340

1341

1342

1343

1344

1345

1346

1347

1348

1349

1350

1351

1352

1353

1354

1355

1356

1357

1358

1359

1360

1361

1362

1363

1364

1365

1366

1367

1368

1369

1370

1371

1372

1373

1374

1375

1376

1377

1378

1379

1380

1381

1382

1383

1384

1385

1386

1387

1388

1389

1390

1391

1392

1393

1394

1395

1396

1397

1398

1399

1400

1401

1402

1403

1404

1405

1406

1407

1408

1409

1410

1411

1412

1413

1414

1415

1416

1417

1418

1419

1420

1421

1422

1423

1424

1425

1426

1427

1428

1429

1430

1431

1432

1433

1434

1435

1436

1437

1438

1439

1440

1441

1442

1443

1444

1445

1446

1447

1448

1449

1450

1451

1452

1453

1454

1455

1456

1457

1458

1459

1460

1461

1462

1463

1464

1465

1466

1467

1468

1469

1470

1471

1472

1473

1474

1475

1476

1477

1478

1479

1480

1481

1482

1483

1484

1485

1486

1487

1488

1489

1490

1491

1492

1493

1494

1495

1496

1497

1498

1499

1500

1501

1502

1503

1504

1505

1506

1507

1508

1509

1510

1511

1512

1513

1514

1515

1516

1517

1518

1519

1520

1521

1522

1523

1524

1525

1526

1527

1528

1529

1530

1531

1532

1533

1534

1535

1536

1537

1538

1539

1540

1541

1542

1543

1544

1545

1546

1547

1548

1549

1550

1551

1552

1553

1554

1555

1556

1557

1558

1559

1560

1561

1562

1563

1564

1565

1566

1567

1568

1569

1570

1571

1572

1573

1574

1575

1576

1577

1578

1579

1580

1581

1582

1583

1584

1585

1586

1587

1588

1589

1590

1591

1592

1593

1594

1595

1596

1597

1598

1599

1600

1601

1602

1603

1604

1605

1606

1607

1608

1609

1610

1611

1612

1613

1614

1615

1616

1617

1618

1619

1620

1621

1622

1623

1624

1625

1626

1627

1628

1629

1630

1631

1632

1633

1634

1635

1636

1637

1638

1639

1640

1641

1642

1643

1644

1645

1646

1647

1648

1649

1650

1651

1652

1653

1654

1655

1656

1657

1658

1659

1660

1661

1662

1663

1664

1665

1666

1667

1668

1669

1670

1671

1672

1673

1674

1675

1676

1677

1678

1679

1680

1681

1682

1683

1684

1685

1686

1687

1688

1689

1690

1691

1692

1693

1694

1695

1696

1697

1698

1699

1700

1701

1702

1703

1704

1705

1706

1707

1708

1709

1710

1711

1712

1713

1714

1715

1716

1717

1718

1719

1720

1721

1722

1723

1724

1725

1726

1727

1728

1729

1730

1731

1732

1733

1734

1735

1736

1737

1738

1739

1740

1741

1742

1743

1744

1745

1746

1747

1748

1749

1750

1751

1752

1753

1754

1755

1756

1757

1758

1759

1760

1761

1762

1763

1764

1765

1766

1767

1768

1769

1770

1771

1772

1773

1774

1775

1776

1777

1778

1779

1780

1781

1782

1783

1784

1785

1786

1787

1788

1789

1790

1791

1792

1793

1794

1795

1796

1797

1798

1799

1800

1801

1802

1803

1804

1805

1806

1807

1808

1809

1810

1811

1812

1813

1814

1815

1816

1817

1818

1819

1820

1821

1822

1823

1824

1825

1826

1827

1828

1829

1830

1831

1832

1833

1834

1835

1836

1837

1838

1839

1840

1841

1842

1843

1844

1845

1846

1847

1848

1849

1850

1851

1852

1853

1854

1855

1856

1857

1858

1859

1860

1861

1862

1863

1864

1865

1866

1867

1868

1869

1870

1871

1872

1873

1874

1875

1876

1877

1878

1879

1880

1881

1882

1883

1884

1885

1886

1887

1888

1889

1890

1891

1892

1893

1894

1895

1896

1897

1898

1899

1900

1901

1902

1903

1904

1905

1906

1907

1908

1909

1910

1911

1912

1913

1914

1915

1916

1917

1918

1919

1920

1921

1922

1923

1924

1925

1926

1927

1928

1929

1930

1931

1932

1933

1934

1935

1936

1937

1938

1939

1940

1941

1942

1943

1944

1945

1946

1947

1948

1949

1950

1951

1952

1953

1954

1955

1956

1957

1958

1959

1960

1961

1962

1963

1964

1965

1966

1967

1968

1969

1970

1971

1972

1973

1974

1975

1976

1977

1978

1979

1980

1981

1982

1983

1984

1985

1986

1987

1988

1989

1990

1991

1992

1993

1994

1995

1996

1997

1998

1999

2000

2001

2002

2003

2004

2005

2006

2007

2008

2009

2010

2011

2012

2013

2014

2015

2016

2017

2018

2019

2020

2021

2022

2023

2024

2025

2026

2027

2028

2029

2030

2031

2032

2033

2034

2035

2036

2037

2038

2039

2040

2041

2042

2043

2044

2045

2046

2047

2048

2049

2050

2051

2052

2053

2054

2055

2056

2057

2058

2059

2060

2061

2062

2063

2064

2065

2066

2067

2068

2069

2070

2071

2072

2073

2074

2075

2076

2077

2078

2079

2080

2081

2082

2083

2084

2085

2086

2087

2088

2089

2090

2091

2092

2093

2094

2095

2096

2097

2098

2099

2100

2101

2102

2103

2104

2105

2106

2107

2108

2109

2110

2111

2112

2113

2114

2115

2116

2117

2118

2119

2120

2121

2122

2123

2124

2125

2126

2127

2128

2129

2130

2131

2132

2133

2134

2135

2136

2137

2138

2139

2140

2141

2142

2143

2144

2145

2146

2147

2148

2149

2150

2151

2152

2153

2154

2155

2156

2157

2158

2159

2160

2161

2162

2163

2164

2165

2166

2167

2168

2169

2170

2171

2172

2173

2174

2175

2176

2177

2178

2179

2180

2181

2182

2183

2184

2185

2186

2187

2188

2189

2190

2191

2192

2193

2194

2195

2196

2197

2198

2199

2200

2201

2202

2203

2204

2205

2206

2207

2208

2209

2210

2211

2212

2213

2214

2215

2216

2217

2218

2219

2220

2221

2222

2223

2224

2225

2226

2227

2228

2229

2230

2231

2232

2233

2234

2235

2236

2237

2238

2239

2240

2241

2242

2243

2244

2245

2246

2247

2248

2249

2250

2251

2252

2253

2254

2255

2256

2257

2258

2259

2260

2261

2262

2263

2264

2265

2266

2267

2268

2269

2270

2271

2272

2273

2274

2275

2276

2277

2278

2279

2280

2281

2282

2283

2284

2285

2286

2287

2288

2289

2290

2291

2292

2293

2294

2295

2296

2297

2298

2299

2300

2301

2302

2303

2304

2305

2306

2307

2308

2309

2310

2311

2312

2313

2314

2315

2316

2317

2318

2319

2320

2321

2322

2323

2324

2325

2326

2327

2328

2329

2330

2331

2332

2333

2334

2335

2336

2337

2338

2339

2340

2341

2342

2343

2344

2345

2346

2347

2348

2349

2350

2351

2352

2353

2354

2355

2356

2357

2358

2359

2360

2361

2362

2363

2364

2365

2366

2367

2368

2369

2370

2371

2372

2373

2374

2375

2376

2377

2378

2379

2380

2381

2382

2383

2384

2385

2386

2387

2388

2389

2390

2391

2392

2393

2394

2395

2396

2397

2398

2399

2400

2401

2402

2403

2404

2405

2406

2407

2408

2409

2410

2411

2412

2413

2414

2415

2416

2417

2418

2419

2420

2

1361 7 4 6.575 1.305 (4.983, 8.167)

1362  
1363 Pooled StDev = 1.53107  
1364

1365 **One-way ANOVA: 4th week versus Treatment**

1366  
1367 Method

1368  
1369 Null hypothesis All means are equal  
1370 Alternative hypothesis At least one mean is different  
1371 Significance level  $\alpha = 0.05$   
1372

1373 Equal variances were assumed for the analysis.  
1374

1375  
1376 Factor Information

1377  
1378 Factor Levels Values  
1379 Treatment 7 1, 2, 3, 4, 5, 6, 7  
1380

1381  
1382 Analysis of Variance

1383  
1384 Source DF Adj SS Adj MS F-Value P-Value  
1385 Treatment 6 18.37 3.062 1.38 0.269  
1386 Error 21 46.62 2.220  
1387 Total 27 64.99  
1388

1389  
1390 Model Summary

1391  
1392 S R-sq R-sq(adj) R-sq(pred)  
1393 1.48993 28.27% 7.77% 0.00%  
1394

1395  
1396 Means

1397  
1398 Treatment N Mean StDev 95% CI  
1399 1 4 9.18 2.12 ( 7.63, 10.72)  
1400 2 4 8.63 2.43 ( 7.08, 10.17)  
1401 3 4 8.175 0.834 (6.626, 9.724)  
1402 4 4 8.150 0.819 (6.601, 9.699)  
1403 5 4 9.275 1.526 (7.726, 10.824)  
1404 6 4 7.450 0.473 (5.901, 8.999)  
1405 7 4 6.875 1.103 (5.326, 8.424)  
1406

1407 Pooled StDev = 1.48993  
1408

1409 **One-way ANOVA: 5th week versus Treatment**

1410  
1411 Method

1412  
1413 Null hypothesis All means are equal  
1414 Alternative hypothesis At least one mean is different  
1415 Significance level  $\alpha = 0.05$   
1416

1417 Equal variances were assumed for the analysis.  
1418

1419  
1420 Factor Information

1421  
1422 Factor Levels Values  
1423 Treatment 7 1, 2, 3, 4, 5, 6, 7  
1424

1425  
1426 Analysis of Variance

1427  
1428 Source DF Adj SS Adj MS F-Value P-Value



```
1429 Treatment    6    18.78    3.131    1.35    0.280
1430 Error       21    48.74    2.321
1431 Total       27    67.53
```

```
1432
1433
1434 Model Summary
```

```
1435
1436      S      R-sq  R-sq(adj)  R-sq(pred)
1437 1.52351  27.82%    7.19%    0.00%
```

```
1438
1439
1440 Means
```

```
1441
1442 Treatment  N    Mean  StDev      95% CI
1443 1           4    10.00   2.21  ( 8.42, 11.58)
1444 2           4     9.22   2.42  ( 7.64, 10.81)
1445 3           4     8.500  0.876 (6.916, 10.084)
1446 4           4     9.450  1.318 (7.866, 11.034)
1447 5           4     9.375  1.526 (7.791, 10.959)
1448 6           4     7.725  0.479 (6.141,  9.309)
1449 7           4     7.750  0.645 (6.166,  9.334)
```

```
1450
1451 Pooled StDev = 1.52351
1452
```

```
1453
```

## 1454 One-way ANOVA: 6th week versus Treatment

```
1455
```

```
1456 Method
```

```
1457
1458 Null hypothesis          All means are equal
1459 Alternative hypothesis   At least one mean is different
1460 Significance level       $\alpha = 0.05$ 
1461 Rows unused            1
```

```
1462
1463 Equal variances were assumed for the analysis.
```

```
1464
```

```
1465
1466 Factor Information
```

```
1467
1468 Factor      Levels  Values
1469 Treatment      7  1, 2, 3, 4, 5, 6, 7
```

```
1470
```

```
1471
1472 Analysis of Variance
```

```
1473
1474 Source      DF  Adj SS  Adj MS  F-Value  P-Value
1475 Treatment    6   22.28   3.714    1.72    0.168
1476 Error       20   43.14   2.157
1477 Total        26   65.42
```

```
1478
```

```
1479
1480 Model Summary
```

```
1481
1482      S      R-sq  R-sq(adj)  R-sq(pred)
1483 1.46866  34.06%    14.28%    0.00%
```

```
1484
```

```
1485
1486 Means
```

```
1487
1488 Treatment  N    Mean  StDev      95% CI
1489 1           4    10.325  1.960  (8.793, 11.857)
1490 2           3     9.73   2.72   ( 7.96, 11.50)
1491 3           4     8.700  0.898 (7.168, 10.232)
1492 4           4     9.650  1.237 (8.118, 11.182)
1493 5           4     9.500  1.472 (7.968, 11.032)
1494 6           4     7.725  0.479 (6.193,  9.257)
1495 7           4     7.975  0.943 (6.443,  9.507)
```

```
1496
```

1497 Pooled StDev = 1.46866

1498

1499 **One-way ANOVA: 7th week versus Treatment**

1500

1501 Method

1502

1503 Null hypothesis All means are equal

1504 Alternative hypothesis At least one mean is different

1505 Significance level  $\alpha = 0.05$

1506 Rows unused 2

1507

1508 Equal variances were assumed for the analysis.

1509

1510

1511 Factor Information

1512

| Factor    | Levels | Values              |
|-----------|--------|---------------------|
| Treatment | 7      | 1, 2, 3, 4, 5, 6, 7 |

1515

1516

1517 Analysis of Variance

1518

| Source    | DF | Adj SS | Adj MS | F-Value | P-Value |
|-----------|----|--------|--------|---------|---------|
| Treatment | 6  | 26.21  | 4.369  | 2.72    | 0.044   |
| Error     | 19 | 30.47  | 1.604  |         |         |
| Total     | 25 | 56.69  |        |         |         |

1523

1524

1525 Model Summary

1526

| S       | R-sq   | R-sq(adj) | R-sq(pred) |
|---------|--------|-----------|------------|
| 1.26640 | 46.24% | 29.27%    | 0.00%      |

1529

1530

1531 Means

1532

| Treatment | N | Mean   | StDev | 95% CI          |
|-----------|---|--------|-------|-----------------|
| 1         | 4 | 10.825 | 1.576 | (9.500, 12.150) |
| 2         | 3 | 10.30  | 1.93  | ( 8.77, 11.83)  |
| 3         | 4 | 8.975  | 0.967 | (7.650, 10.300) |
| 4         | 4 | 9.800  | 1.449 | (8.475, 11.125) |
| 5         | 3 | 8.967  | 0.981 | (7.436, 10.497) |
| 6         | 4 | 7.750  | 0.507 | (6.425, 9.075)  |
| 7         | 4 | 8.500  | 1.122 | (7.175, 9.825)  |

1541

1542 Pooled StDev = 1.26640

1543

1544 7<sup>th</sup> week of shoot length data sets were shown significant difference comparatively other

1545 weeks.

1546

1547

1548

1549

1550

1551

1552

1553

1554

1555

1556

1557

1558

1559

1560

1561

1562  
1563  
1564  
1565  
1566  
1567  
1568  
1569  
1570
